# Supplementary material
Source: publisher site journal article supplement (https://www.dovepress.com/article/126553)
Supplement: Supplementary file 1 [file get_supplementary_file.php]

## **Supporting Information for:**

# **Light-triggered liposomal cargo delivery platform incorporating photosensitizers and gold nanoparticles for enhanced singlet oxygen generation and increased cytotoxicity**

Zofia Kautzka<sup>1</sup>, Sandhya Clement<sup>1</sup>, Ewa M Goldys<sup>1</sup> and Wei Deng<sup>1\*</sup>

<sup>1</sup>Centre of Excellence for Nanoscale Biophotonics, Macquarie University, North Ryde, Sydney, 2109, NSW, Australia

Correspondence: Wei Deng

Centre of Excellence for Nanoscale Biophotonics, Physics and Astronomy Department, Macquarie University, North Ryde, Sydney, 2109, NSW, Australia

Tel: +61 2 9850 9547

E-mail : [wei.deng@mq.edu.au](mailto:wei.deng@mq.edu.au)

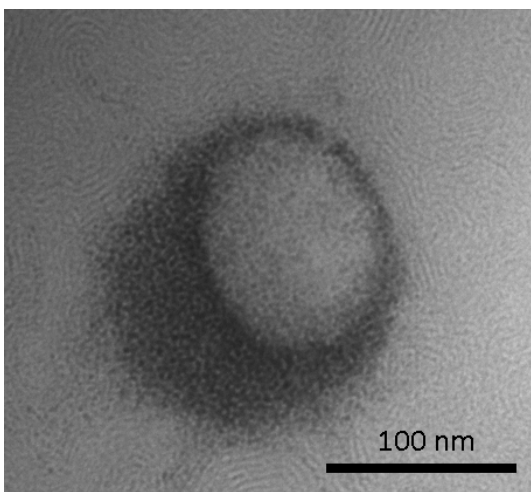

Figure S1. The TEM image of gold nanoparticles with a size of 3-5 nm used in this study.

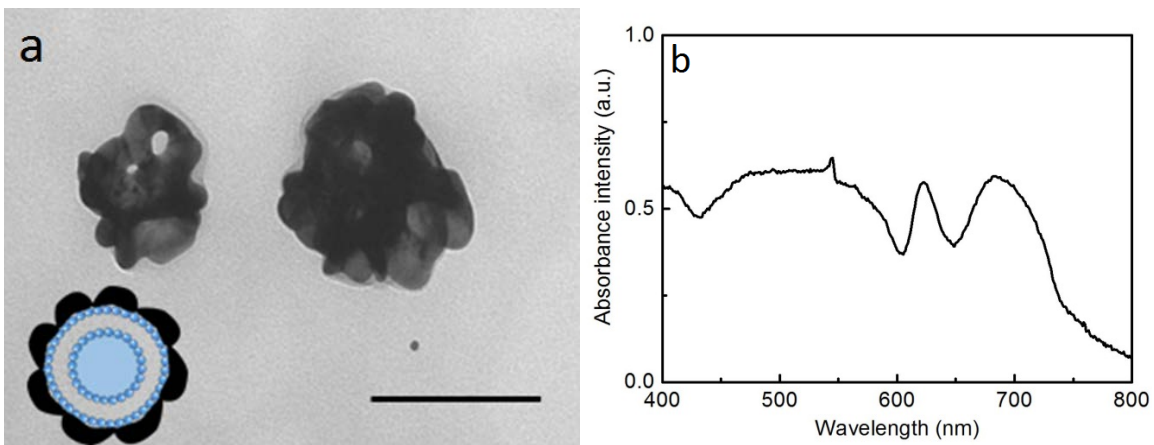

Figure S2. TEM image (a) and absorption spectrum (b) of gold-coated liposomes. Inset in (a) is its schematic illustration. The scale bar is 100 nm.

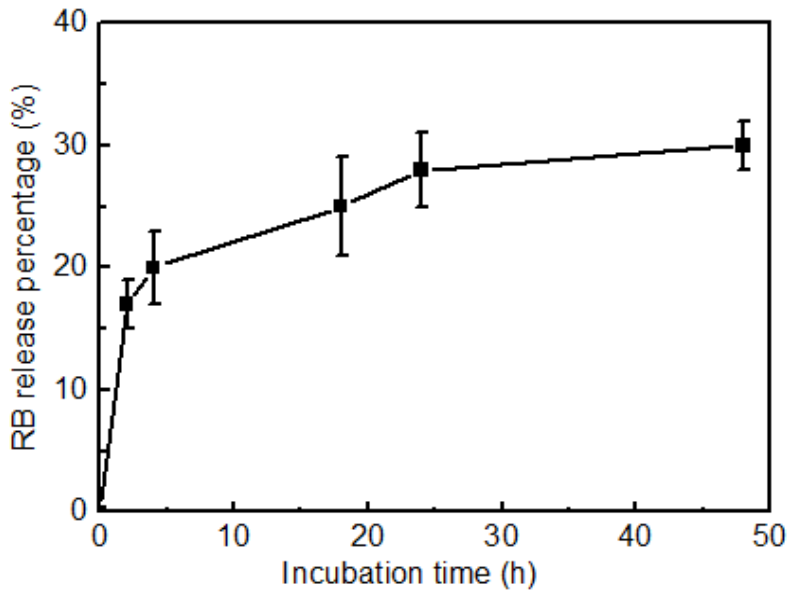

Figure S3. The percentage of released RB from liposomes (57:5:17) after 0 hr, 2 hr, 4 hr, 18 hr, 24 hr and 48 hr incubation in PBS (pH 7.4) containing 10% FBS

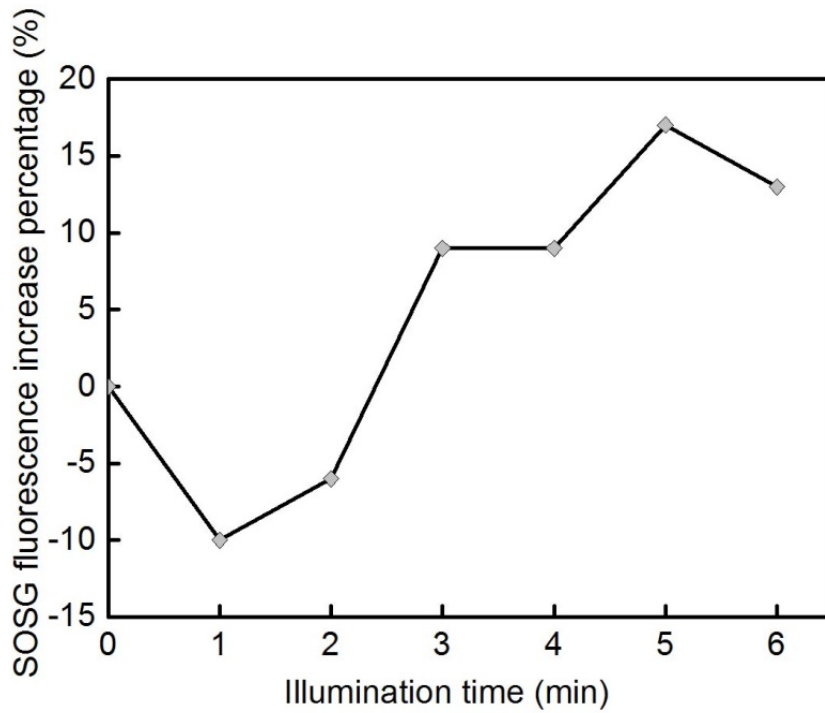

Figure S4. The increase percentage of SOSG fluorescence intensities in gold-coated liposomes exposed to a 532nm laser at different illumination time points.

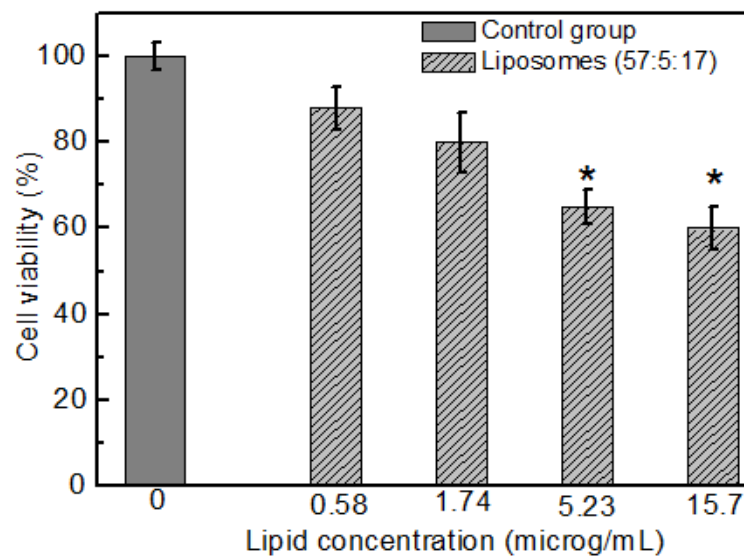

**Figure S5. Cytotoxicity of gold-loaded liposomes incorporating RB and Dox (57:5:17) in MCF-7 cells after 6-min illumination. Data points represent the mean  $\pm$  S.D. of three separate experiments (n = 3), each performed in triplicate. \*P < 0.05 compared to the control group.**

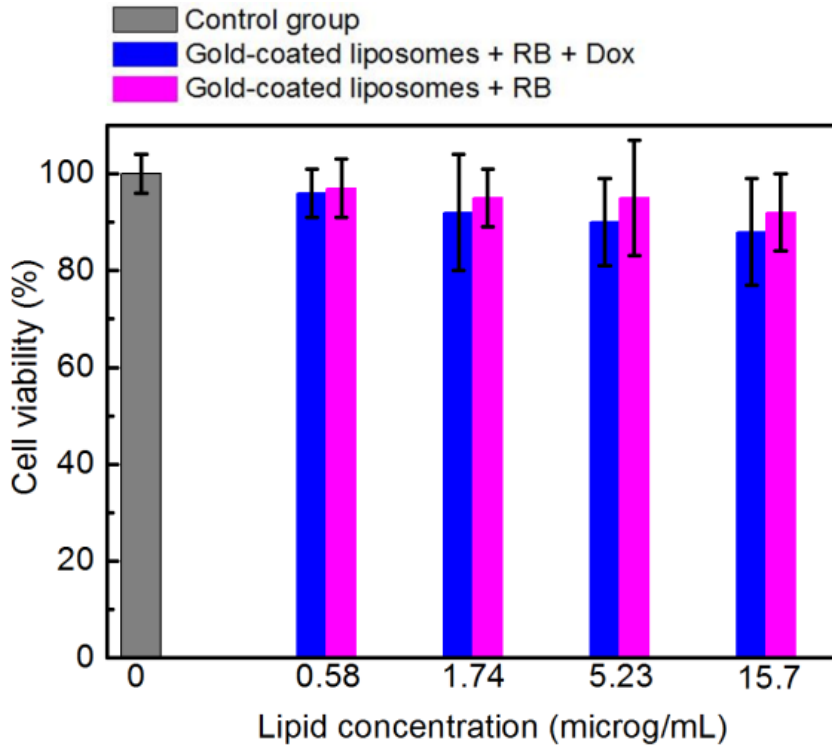

Figure S6. Cytotoxicity of different gold-coated liposomes on HCT116 cells after 6-min illumination.

No significant change was observed by Student's t test.

### Estimation of the number of gold nanoparticles per liposome:

We first calculated the total number of gold atom ( $N_{atom}$ ) in our gold-loaded liposome sample based on ICP-MS analysis and the equation:

$$N_{atom} = \frac{[Au^{3+}] \times V}{M} \times N_A \quad (1)$$

Where  $[Au^{3+}]$  is the concentration of Au (III),  $V$  stands for the sample volume,  $M$  indicates the atomic weight of gold and  $N_A$  is the Avogadro number ( $6.023 \times 10^{23}$  mol/L).

The average number of gold atoms per gold nanoparticle ( $U$ ) was also calculated by using the following equation [1]:

$$U = \frac{2}{3} \times \pi \times \left(\frac{D}{\alpha}\right)^3 \quad (2)$$

Where  $D$  refers to the diameter of gold nanoparticle and  $a$  is the edge of a unit cell whose value was 4.0786 Å. Therefore the number of gold nanoparticles ( $N_{gold}$ ) in a gold-loaded liposome sample can be calculated based on the equation:

$$N_{gold} = \frac{N_{atom}}{U} \quad (3)$$

The number of lipid molecules ( $N_{tot}$ ) in each liposome was calculated by using the equations:

$$N_{tot} = \frac{[4\pi(\frac{d}{2})^2 + 4\pi[\frac{d}{2} - h]^2]}{a} \quad (4)$$

where  $d$  is the diameter of a liposome,  $h$  indicates the thickness of a liposomal bilayer that was calculated as 4.7 nm for our lipid formulation, and  $a$  represents the average lipid head group area, whose value was calculated according to  $a = a_1 N_1 + a_2 N_2 + a_3 N_3 + \dots$ , where  $N$  is the molar fraction of each lipid component and  $a$  is 64 Å for HSPC and 61 Å for PE-NH<sub>2</sub> in our study [2].

The number of gold-loaded liposome for known concentration of lipid was estimated by using the equation:

$$N_{lipo} = \frac{[lipid] \times N_A}{N_{tot} \times 1000} \quad (5)$$

where  $[lipid]$  is the lipid concentration,  $N_A$  is the Avogadro number ( $6.023 \times 10^{23}$  mol/L) and  $N_{tot}$  is the total number of lipids per liposome.

Finally the number of gold nanoparticles per liposome ( $N$ ) can be estimated as per the equation:

$$N = \frac{N_{gold}}{N_{lipo}} \quad (6)$$

## References:

1. Chithrani BD, Ghazani AA, and Chan WC, Determining the size and shape dependence of gold nanoparticle uptake into mammalian cells. *Nano letters*, 2006; **6**(4): p. 662-668.
2. Murzyn K, Róg T, and Pasenkiewicz-Gierula M, Phosphatidylethanolamine-phosphatidylglycerol bilayer as a model of the inner bacterial membrane. *Biophysical journal*, 2005; **88**(2): p. 1091-1103.
